# Supplementary material
Source: Springer Nature journal article supplement (https://www.springermedizin.de/resource/supplementary/12879_2012_2002_MOESM6_ESM.pdf/9443448)

Case Totals

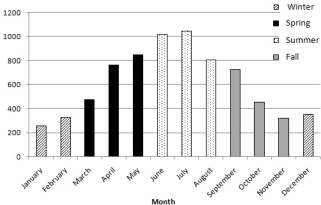

Supplement: MOESM6 [file 9443448]
